# Supplementary material
Source: publisher figshare collection journal article supplement (https://acs.figshare.com/ndownloader/files/3860281)
Supplement: Supplementary file 1 [file 3860281]

## SUPPORTING INFORMATION

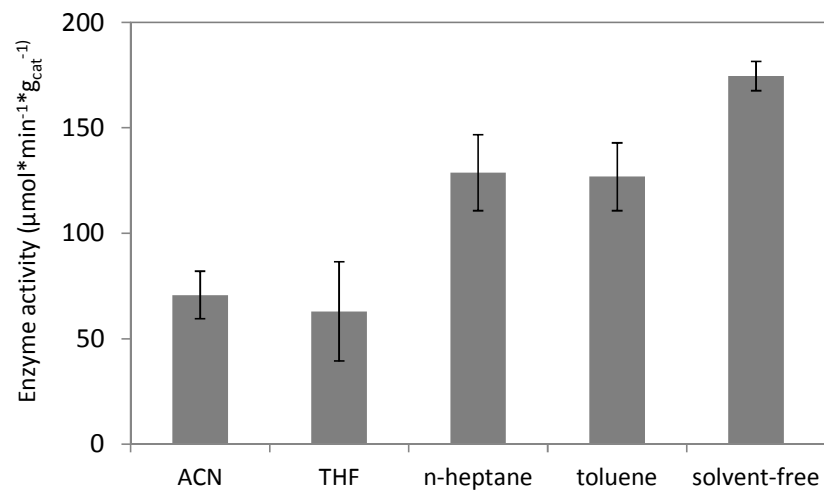

**Figure S1 - Solvent screening for enzyme activity tests: Lipase CALB activity for transesterification of ethyl butyrate with *n*-butanol in different solvents and in a solvent-free system. ACN - acetonitrile, THF - Tetrahydrofuran**

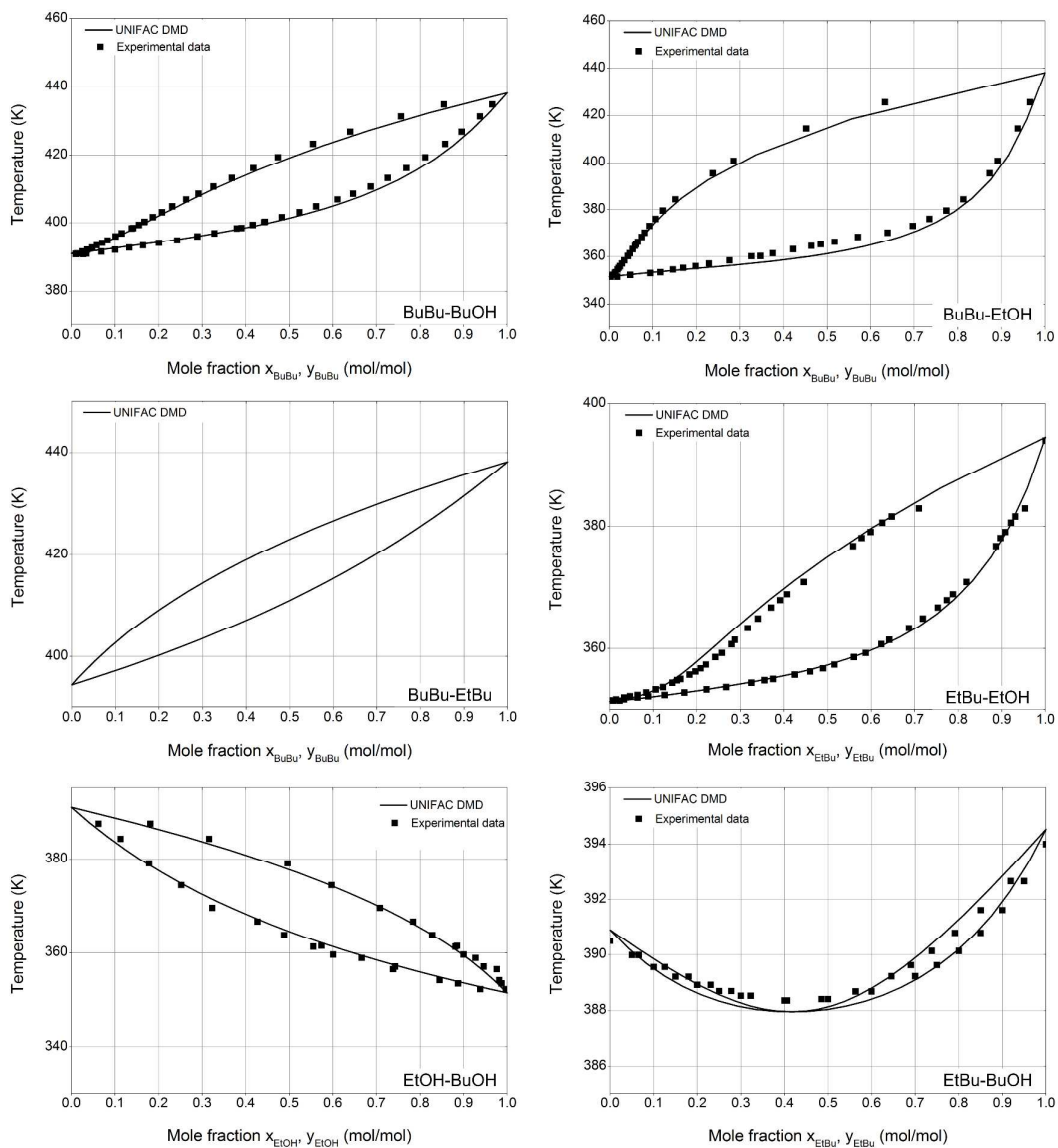

**Figure S2. VLEs of all main components calculated with UNIFAC DMD and compared to available experimental data from literature**
